# Supplementary material for: Switching from branded to generic glatiramer acetate: 15-month GATE trial extension results
Source: PubMed Central journal article supplement — Mult Scler. 2017 Jan 16;23(14):1909–17. doi: 10.1177/1352458516688956 (PMC5700775; doi:10.1177/1352458516688956), 2017-01-16

## SUPPLEMENTARY ONLINE CONTENT

Supplement to: Krzysztof Selmaj, Frederik Barkhof, Anna Belova, et al. Switching from branded to generic glatiramer acetate: 15-month GATE trial extension results

This appendix has been provided by the authors to give readers additional information about their work.

### eTABLES

eTable 1 Adverse events reported for  $\geq 1\%$  of subjects in the GTR/GTR group or GA/GTR group or for more than two subjects in the PLC/GTR group summarized by MedDRA SOC and PT (open-label part - Safety Set)

### eFIGURES

eFigure 1 Design of the GATE trial.

eFigure 2 Frequency distribution of local injection site reaction scores (safety population)

## Supplemental Table e-1

Adverse events reported for  $\geq 1\%$  of subjects in the GTR/GTR group or GA/GTR group or for more than two subjects in the PLC/GTR group summarized by MedDRA SOC and PT (open-label part - Safety Set)

| <b>Event classified by System Organ Class Preferred Term – no. (%) of patients</b> | <b>GTR/GTR<br/>(N=324)<br/>n (%)</b> | <b>GA/GTR<br/>(N=323)<br/>n (%)</b> | <b>Placebo/GTR<br/>(N=81)<br/>n (%)</b> | <b>Total<br/>(N=728)<br/>n (%)</b> |
|------------------------------------------------------------------------------------|--------------------------------------|-------------------------------------|-----------------------------------------|------------------------------------|
| <b>Any event</b>                                                                   | <b>108(33.3%)</b>                    | <b>118(36.5%)</b>                   | <b>35(43.2%)</b>                        | <b>261(35.9%)</b>                  |
| <b>Infections and infestations</b>                                                 | <b>40(12.3%)</b>                     | <b>51(15.8%)</b>                    | <b>16(19.8%)</b>                        | <b>107(14.7%)</b>                  |
| Nasopharyngitis                                                                    | 15(4.6%)                             | 16(5.0%)                            | 8(9.9%)                                 | 39(5.4%)                           |
| Bronchitis                                                                         | 4(1.2%)                              | 2(0.6%)                             | 0(0.0%)                                 | 6(0.8%)                            |
| Respiratory tract infection viral                                                  | 4(1.2%)                              | 1(0.3%)                             | 1(1.2%)                                 | 6(0.8%)                            |
| Influenza                                                                          | 2(0.6%)                              | 4(1.2%)                             | 0(0.0%)                                 | 6(0.8%)                            |
| Rhinitis                                                                           | 2(0.6%)                              | 4(1.2%)                             | 0(0.0%)                                 | 6(0.8%)                            |
| Urinary tract infection                                                            | 1(0.3%)                              | 6(1.9%)                             | 1(1.2%)                                 | 8(1.1%)                            |
| <b>General disorders and administration site conditions</b>                        | <b>31(9.6%)</b>                      | <b>27(8.4%)</b>                     | <b>12(14.8%)</b>                        | <b>70(9.6%)</b>                    |
| Asthenia                                                                           | 7(2.2%)                              | 2(0.6%)                             | 0(0.0%)                                 | 9(1.2%)                            |
| Immediate post-injection reaction                                                  | 7(2.2%)                              | 3(0.9%)                             | 1(1.2%)                                 | 11(1.5%)                           |
| Injection site reaction                                                            | 4(1.2%)                              | 3(0.9%)                             | 8(9.9%)                                 | 15 (2.1%)                          |
| Injection site pain                                                                | 1(0.3%)                              | 5(1.5%)                             | 1(1.2%)                                 | 7(1.0%)                            |
| <b>Nervous system disorders</b>                                                    | <b>31(9.6%)</b>                      | <b>28(8.7%)</b>                     | <b>7(8.6%)</b>                          | <b>66(9.1%)</b>                    |
| Headache                                                                           | 9(2.8%)                              | 5(1.5%)                             | 2(2.5%)                                 | 16(2.2%)                           |
| Multiple sclerosis relapse                                                         | 5(1.5%)                              | 6(1.9%)                             | 1(1.2%)                                 | 12(1.6%)                           |
| <b>Musculoskeletal and connective tissue disorders</b>                             | <b>17(5.2%)</b>                      | <b>11(3.4%)</b>                     | <b>5(6.2%)</b>                          | <b>33(4.5%)</b>                    |
| Back pain                                                                          | 7(2.2%)                              | 3(0.9%)                             | 0(0.0%)                                 | 10(1.4%)                           |

| <b>Event classified by System Organ Class Preferred Term – no. (%) of patients</b> | <b>GTR/GTR<br/>(N=324)<br/>n (%)</b> | <b>GA/GTR<br/>(N=323)<br/>n (%)</b> | <b>Placebo/GTR<br/>(N=81)<br/>n (%)</b> | <b>Total<br/>(N=728)<br/>n (%)</b> |
|------------------------------------------------------------------------------------|--------------------------------------|-------------------------------------|-----------------------------------------|------------------------------------|
| <b>Investigations</b>                                                              | <b>11 (3.4%)</b>                     | <b>5 (1.5%)</b>                     | <b>1 (1.2%)</b>                         | <b>17 (2.3%)</b>                   |
| <b>Renal and urinary disorders</b>                                                 | <b>9 (2.8%)</b>                      | <b>5 (1.5%)</b>                     | <b>1 (1.2%)</b>                         | <b>15 (2.1%)</b>                   |
| <b>Gastrointestinal disorders</b>                                                  | <b>8 (2.5%)</b>                      | <b>14 (4.3%)</b>                    | <b>1 (1.2%)</b>                         | <b>23 (3.2%)</b>                   |
| <b>Injury, poisoning and procedural complications</b>                              | <b>7 (2.2%)</b>                      | <b>6 (1.9%)</b>                     | <b>3 (3.7%)</b>                         | <b>16 (2.2%)</b>                   |
| <b>Reproductive system and breast disorders</b>                                    | <b>7 (2.2%)</b>                      | <b>5 (1.5%)</b>                     | <b>2 (2.5%)</b>                         | <b>14 (1.9%)</b>                   |
| <b>Blood and lymphatic system disorders</b>                                        | <b>6(1.9%)</b>                       | <b>8(2.5%)</b>                      | <b>1(1.2%)</b>                          | <b>15(2.1%)</b>                    |
| Anemia                                                                             | 4(1.2%)                              | 3(0.9%)                             | 1(1.2%)                                 | 8(1.1%)                            |
| <b>Psychiatric disorders</b>                                                       | <b>6(1.9%)</b>                       | <b>10(3.1%)</b>                     | <b>3(3.7%)</b>                          | <b>19(2.6%)</b>                    |
| Anxiety                                                                            | 0(0.0%)                              | 4(1.2%)                             | 1(1.2%)                                 | 5(0.7%)                            |
| <b>Skin and subcutaneous tissue disorders</b>                                      | <b>5 (1.5%)</b>                      | <b>9 (2.8%)</b>                     | <b>1 (1.2%)</b>                         | <b>15 (2.1%)</b>                   |
| <b>Cardiac disorders</b>                                                           | <b>4 (1.2%)</b>                      | <b>1 (0.3%)</b>                     | <b>1 (1.2%)</b>                         | <b>5 (0.7%)</b>                    |
| <b>Ear and labyrinth disorders</b>                                                 | <b>4 (1.2%)</b>                      | <b>2 (0.6%)</b>                     | <b>0 (0.0%)</b>                         | <b>6 (0.8%)</b>                    |
| <b>Metabolism and nutrition disorders</b>                                          | <b>3 (0.9%)</b>                      | <b>5 (1.5%)</b>                     | <b>0 (0.0%)</b>                         | <b>10 (1.4%)</b>                   |
| <b>Neoplasms benign, malignant and unspecified (including cysts and polyps)</b>    | <b>3 (0.9%)</b>                      | <b>5 (1.5%)</b>                     | <b>2 (2.5%)</b>                         | <b>9 (1.2%)</b>                    |
| <b>Respiratory, thoracic and mediastinal disorder</b>                              | <b>3 (0.9%)</b>                      | <b>7 (2.2%)</b>                     | <b>1 (1.2%)</b>                         | <b>13 (1.8%)</b>                   |
| <b>Vascular disorders</b>                                                          | <b>3 (0.9%)</b>                      | <b>8 (2.5%)</b>                     | <b>3 (3.7%)</b>                         | <b>12 (1.6%)</b>                   |
| <b>Eye disorders</b>                                                               | <b>2 (0.6%)</b>                      | <b>2 (0.6%)</b>                     | <b>1 (1.2%)</b>                         | <b>5 (0.7%)</b>                    |
| <b>Hepatobiliary disorders</b>                                                     | <b>2 (0.6%)</b>                      | <b>1 (0.3%)</b>                     | <b>0 (0.0%)</b>                         | <b>3 (0.4%)</b>                    |
| <b>Immune system disorders</b>                                                     | <b>1 (0.3%)</b>                      | <b>1 (0.3%)</b>                     | <b>2 (2.5%)</b>                         | <b>4 (0.5%)</b>                    |
| <b>Endocrine disorders</b>                                                         | <b>0 (0.0%)</b>                      | <b>1 (0.3%)</b>                     | <b>0 (0.0%)</b>                         | <b>1 (0.1%)</b>                    |

| <b>Event classified by System Organ</b>           | <b>GTR/GTR</b>                 | <b>GA/GTR</b>                  | <b>Placebo/GTR</b>            | <b>Total</b>                   |
|---------------------------------------------------|--------------------------------|--------------------------------|-------------------------------|--------------------------------|
| <b>Class Preferred Term – no. (%) of patients</b> | <b>(N=324)</b><br><b>n (%)</b> | <b>(N=323)</b><br><b>n (%)</b> | <b>(N=81)</b><br><b>n (%)</b> | <b>(N=728)</b><br><b>n (%)</b> |
| <b>Surgical and medical procedures</b>            | <b>0 (0.0%)</b>                | <b>1 (0.3%)</b>                | <b>0 (0.0%)</b>               | <b>1 (0.1%)</b>                |

**Supplemental Figure e-1**

**Design of the GATE trial.**

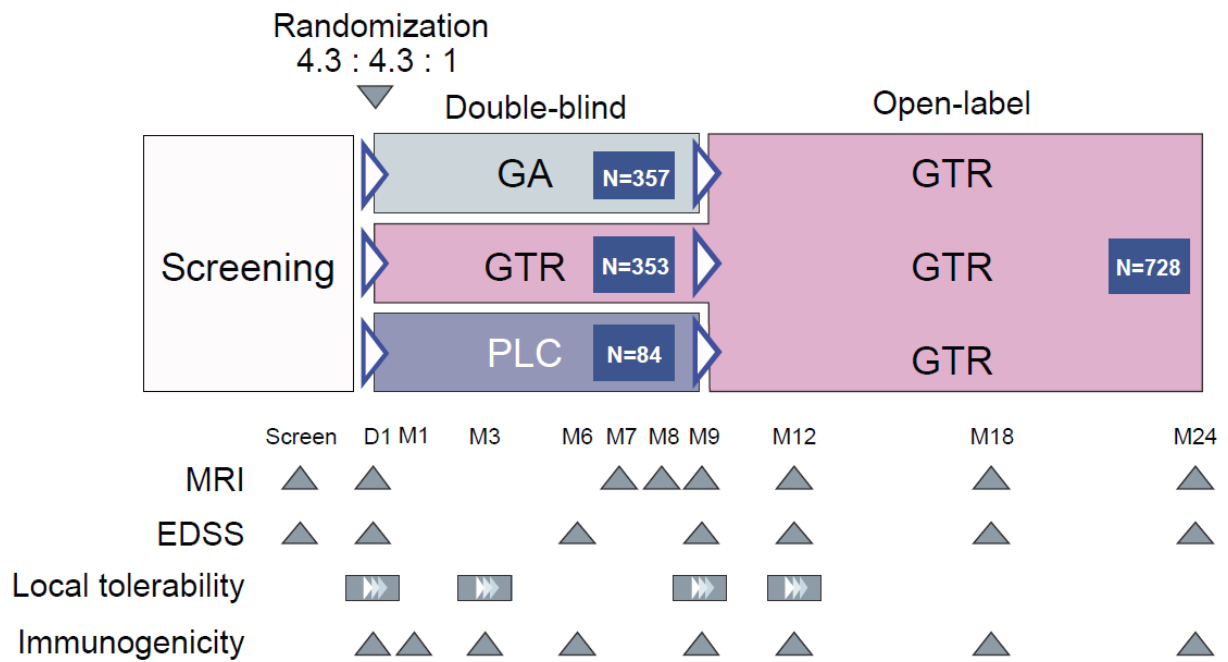

## **Supplemental Figure e-2**

### **Frequency distribution of local injection site reaction scores (safety population)**

Patients completed a diary for 14 consecutive days at the initiation of open-label treatment (Panels A and B) and month 12 (Panels C and D), recording which of five injection site symptoms (pain, itchiness, redness, swelling, or lumps) were present after 5 minutes (Panels A and C) or 24 hours (Panels B and D). The local injection site reaction score represents the number (from 0 to 5) of symptoms present. GA = brand glatiramer acetate, GTR = generic glatiramer acetate, LISR = Local injection site reaction.

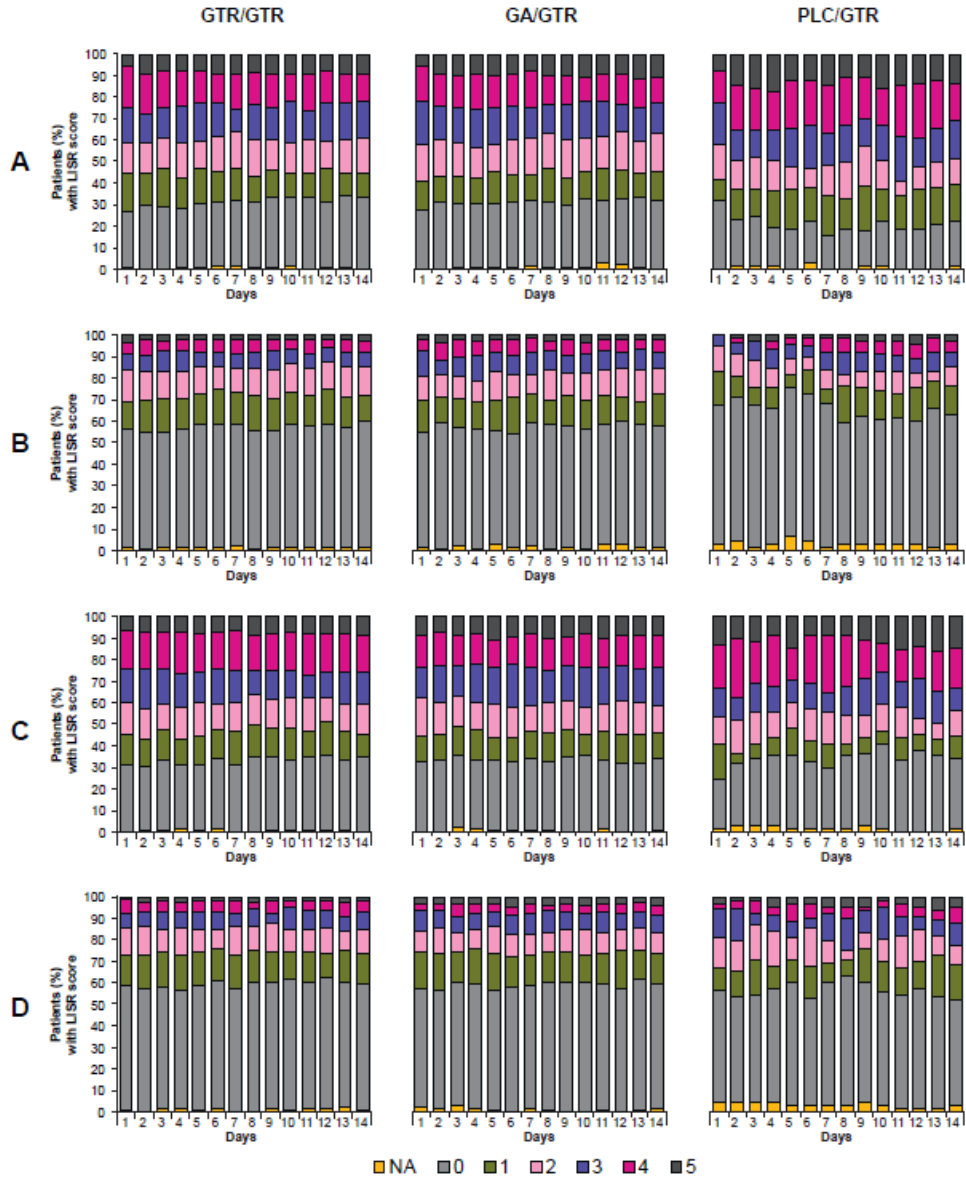

Supplement: MSJ688956_supplementary_material.pdf [file MSJ688956_supplementary_material.pdf]
