# Supplementary material for: Switching from branded to generic glatiramer acetate: 15-month GATE trial extension results
Source: PubMed Central journal article supplement — Mult Scler. 2017 Jan 16;23(14):1909–17. doi: 10.1177/1352458516688956 (PMC5700775; doi:10.1177/1352458516688956), 2017-01-16
Supplement: MSJ688956_supplementary_appendix.pdf [file MSJ688956_supplementary_appendix.pdf]

**Acquisition sequence**

If used, provide name of contrast agent, dose and timing of scan post-contrast administration

Gadolinium contrast agent (preferably non-linear) was injected after T1 Pre but before PD/T2 and T1 Post sequence

Other parameters:

| <b>Image analysis methods and outputs</b>                                                                                                      |                                                            |
|------------------------------------------------------------------------------------------------------------------------------------------------|------------------------------------------------------------|
| <b>Lesions</b>                                                                                                                                 |                                                            |
| Type<br>(e.g. Gd-enhancing, T2-hyperintense, T1-hypointense)                                                                                   | Gd-enhancing, T2-hyperintense, T1 hypointense              |
| Analysis method                                                                                                                                | Local thresholding after visual detection                  |
| Analysis software                                                                                                                              | MIPAV                                                      |
| Output measure<br>(e.g. count or volume [ml])                                                                                                  | GdE and T2: count<br>T2 volume, T1 volume: mm <sup>3</sup> |
| <b>Tissue volumes</b>                                                                                                                          |                                                            |
| Type<br>(e.g. whole brain, grey matter, white matter, spinal cord)                                                                             | Whole brain                                                |
| Analysis method                                                                                                                                |                                                            |
| Analysis software                                                                                                                              | SIENA/SIENAX                                               |
| Output measure<br>(e.g. absolute tissue volume in ml, tissue volume as a fraction of intracranial volume, percentage change in tissue volumes) | Percentage change in tissue volumes                        |
| <b>Tissue measures (e.g. MTR, DTI, T1-RT, T2-RT, T2*, T2', <sup>1</sup>H-MRS, perfusion, Na)</b>                                               |                                                            |
| Type<br>(e.g. whole brain, grey matter, white matter, spinal cord, normal-appearing grey matter or white matter)                               | -                                                          |
| Analysis method                                                                                                                                |                                                            |
| Analysis software                                                                                                                              |                                                            |
| Output measure                                                                                                                                 |                                                            |
| <b>Other MRI measures (e.g. functional MRI)</b>                                                                                                |                                                            |
| Type<br>(e.g. whole brain, grey matter, white matter, spinal cord, normal-appearing grey matter or white matter)                               | -                                                          |
| Analysis method                                                                                                                                |                                                            |
| Analysis software                                                                                                                              |                                                            |
| Output measure                                                                                                                                 |                                                            |

**Other analysis details:**
